# Supplementary material for: Activation of Cryptic Antibiotic Biosynthetic Gene Clusters Guided by RNA-seq Data from Both Streptomyces ansochromogenes and ΔwblA
Source: MDPI journal article supplement (doi:10.3390/antibiotics10091097), 2021-09-10
Supplement: s1 [file s1]

## Supplementary Materials Figures

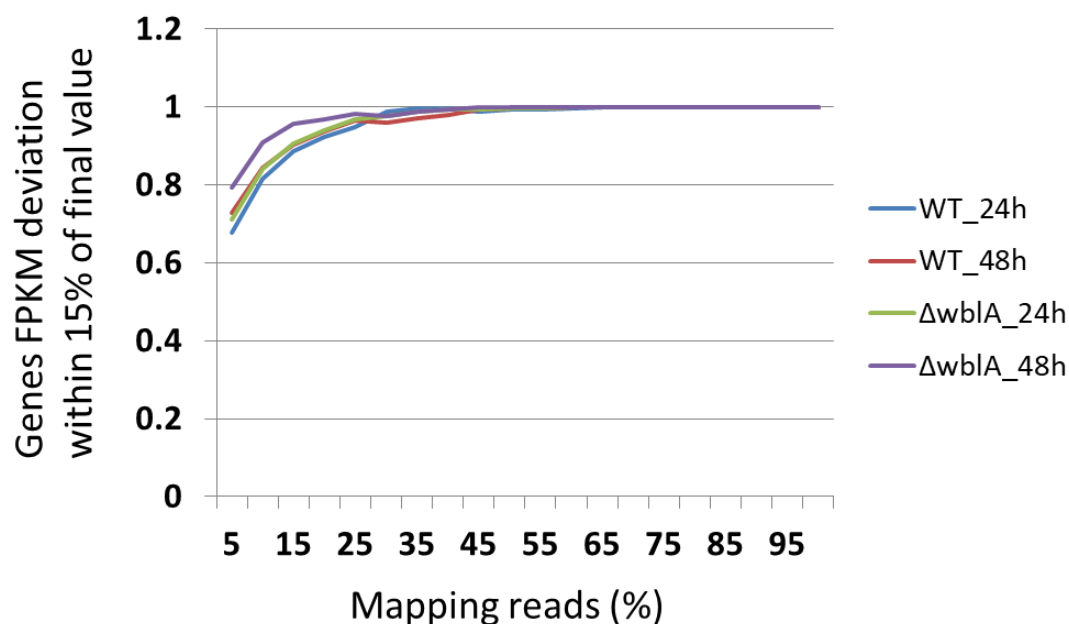

**Figure S1. Saturation curves of sequencing data in RNA-seq.** The X axis is the percentage of effective reads comparison (e.g., 80 means that 80% of the comparison sequencing data were randomly selected to calculate the expression level of this gene). The Y axis is the deviation ratio (error within 15%) between the expression level and the final value under the sampling condition (e.g., 0.8 means that 80% of the gene expression level has an error within 15%). The value is closer to 1, the expression level is more saturated. Each color line represents the saturation curve of gene expression at different expression levels in the eight samples.

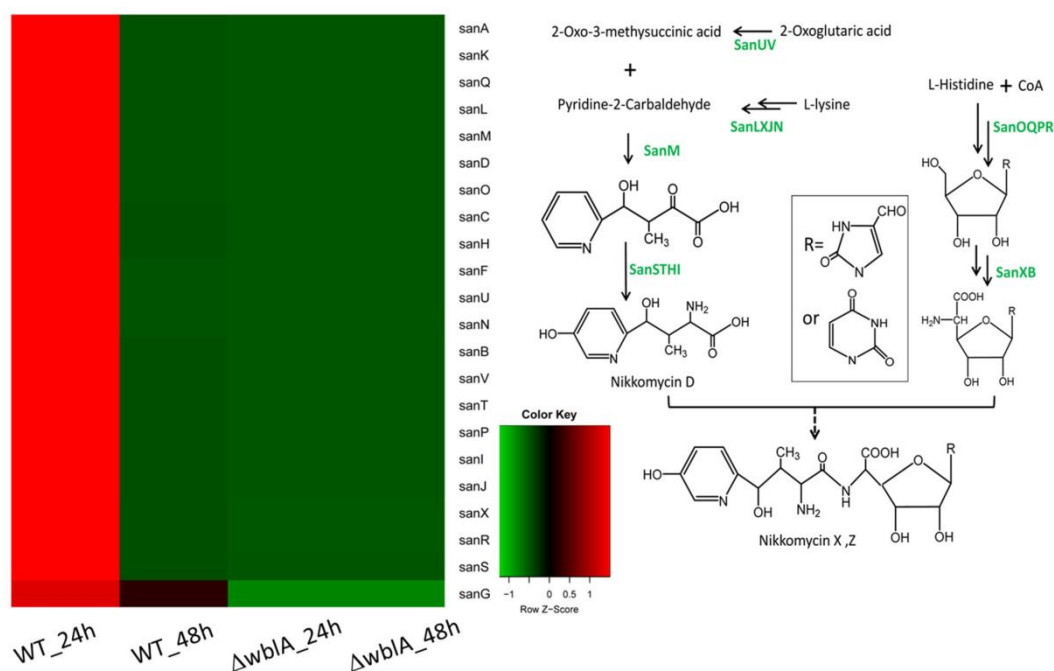

**Figure S2. Differentially expressed genes involved in nikkomycin biosynthesis in both WT and  $\Delta wblA$ .** (a) Heatmap represents the transcriptional level of nikkomycin biosynthetic genes in both WT and  $\Delta wblA$ . (b) Diagram of nikkomycin X and Z biosynthesis. Double arrows represent multiple reaction steps, and dashed arrows represent unknown paths.

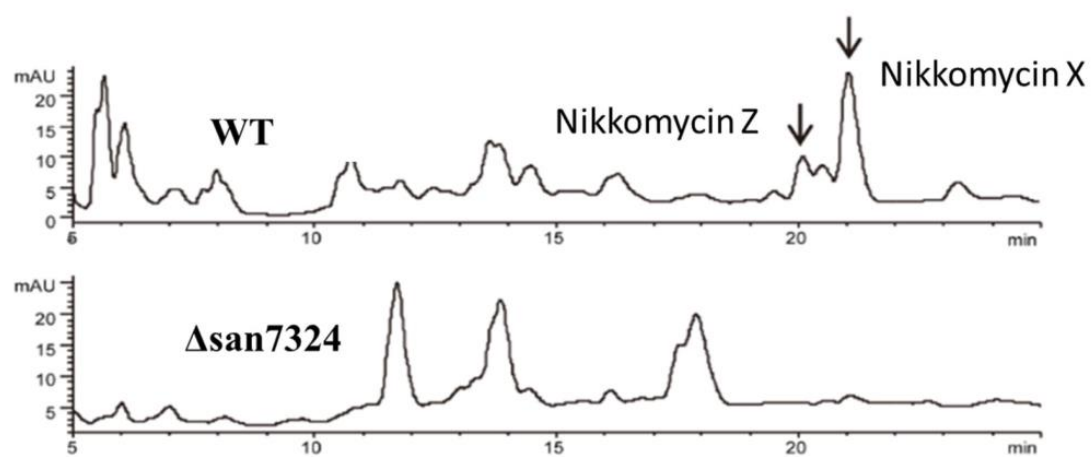

**Figure S3.** HPLC analysis of nikkomycin production in WT and  $\Delta$ san7324. San7324 (Ctg1\_705) encoding by *san7324* is a RsbR homolog.
